# Supplementary material for: Cytokinin Promotes Jasmonic Acid Accumulation in the Control of Maize Leaf Growth
Source: MDPI journal article supplement (doi:10.3390/plants12163014), 2023-08-21
Supplement: s1 [file s1]

## SUPPLEMENTAL DATA

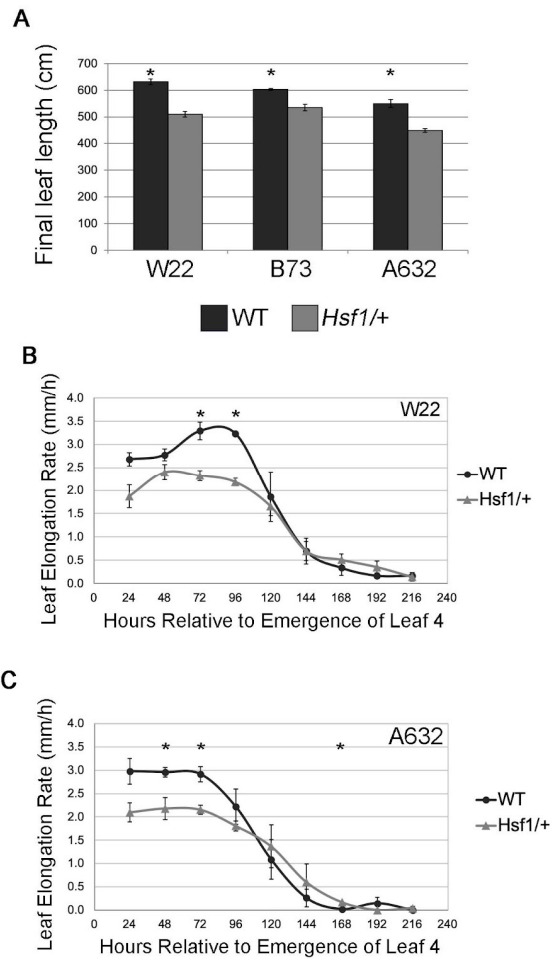

**Supplemental Figure S1.** *Hsf1* growth in different inbred backgrounds. **(A)** Barplots of WT and *Hsf1/+* final leaf lengths. Error bars = SE. **(B-C)** Average leaf elongation rate (LER) of leaf #4 of *Hsf1/+* and WT siblings in the **(B)** W22, and **(C)** A632 inbred backgrounds. Asterisks mark significant differences  $P < 0.05$ . Error bars = SE. W22,  $n=3$  WT,  $n=7$  *Hsf1/+*; B73,  $n=5$  WT,  $n=2$  *Hsf1/+*; A632,  $n=4$  WT,  $n=3$  *Hsf1/+*.

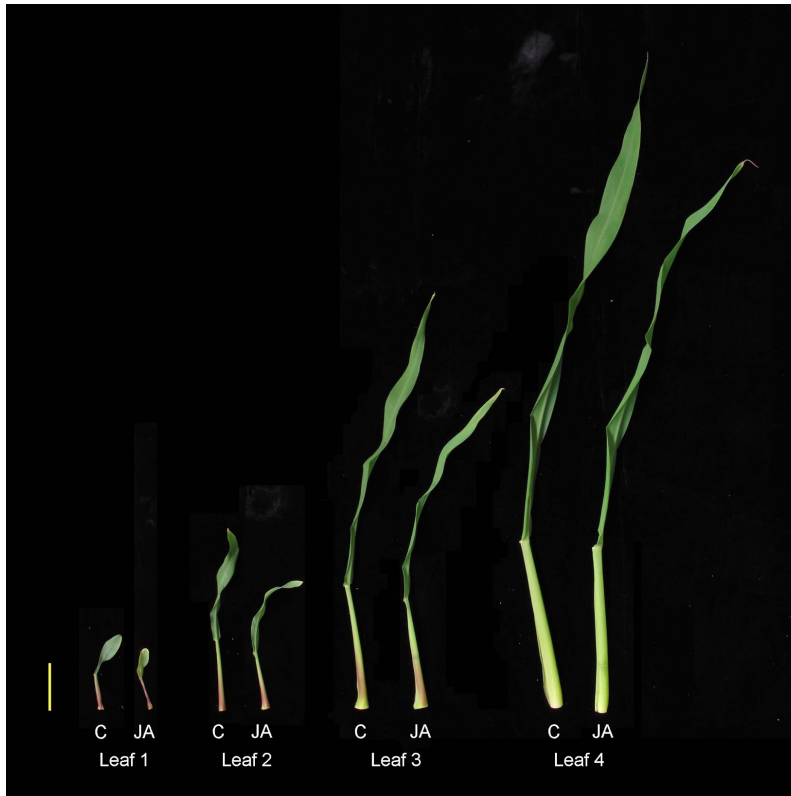

**Supplemental Figure S2.** Comparison of control (C) and jasmonic acid (JA) treated leaves #1-4. Scale bar = 5 cm.

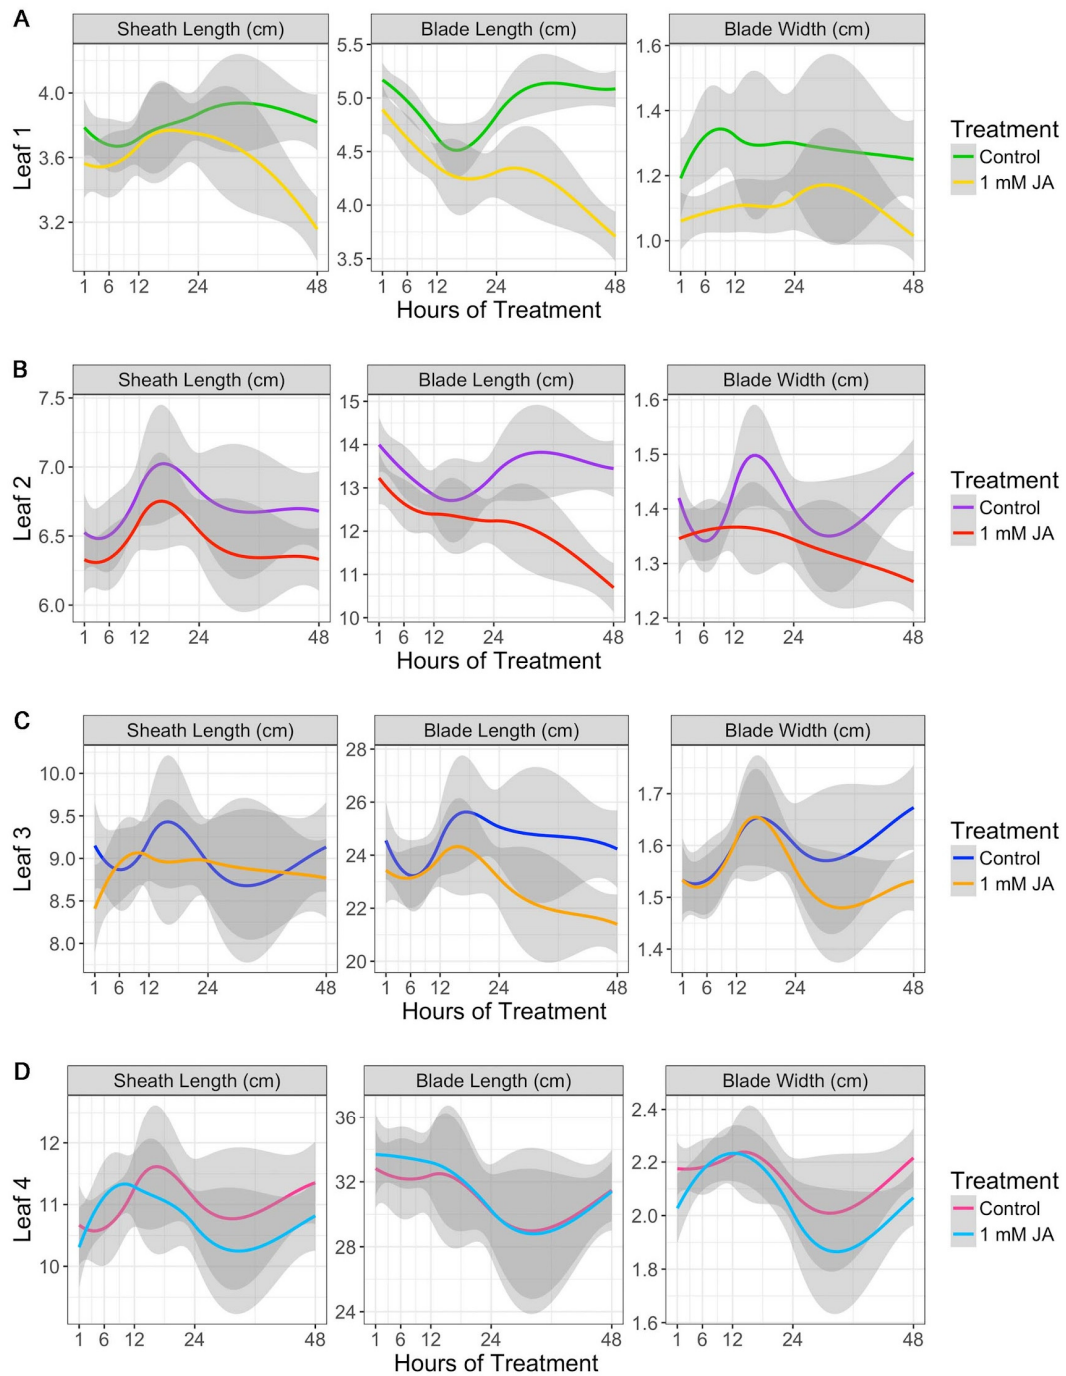

**Supplemental Figure S3.** Final leaf measurements of B73 treated with 1 mM JA or control solution for 1, 6, 12, 24, or 48 hours. Leaf 1 (A), leaf 2 (B), leaf 3 (C), and leaf 4 (D) were measured for all plants.  $N \geq 14$  for each treatment group, lines are smoothed conditional means, and shaded area is the 95% confidence interval. Treatments are significant where confidence intervals do not overlap.

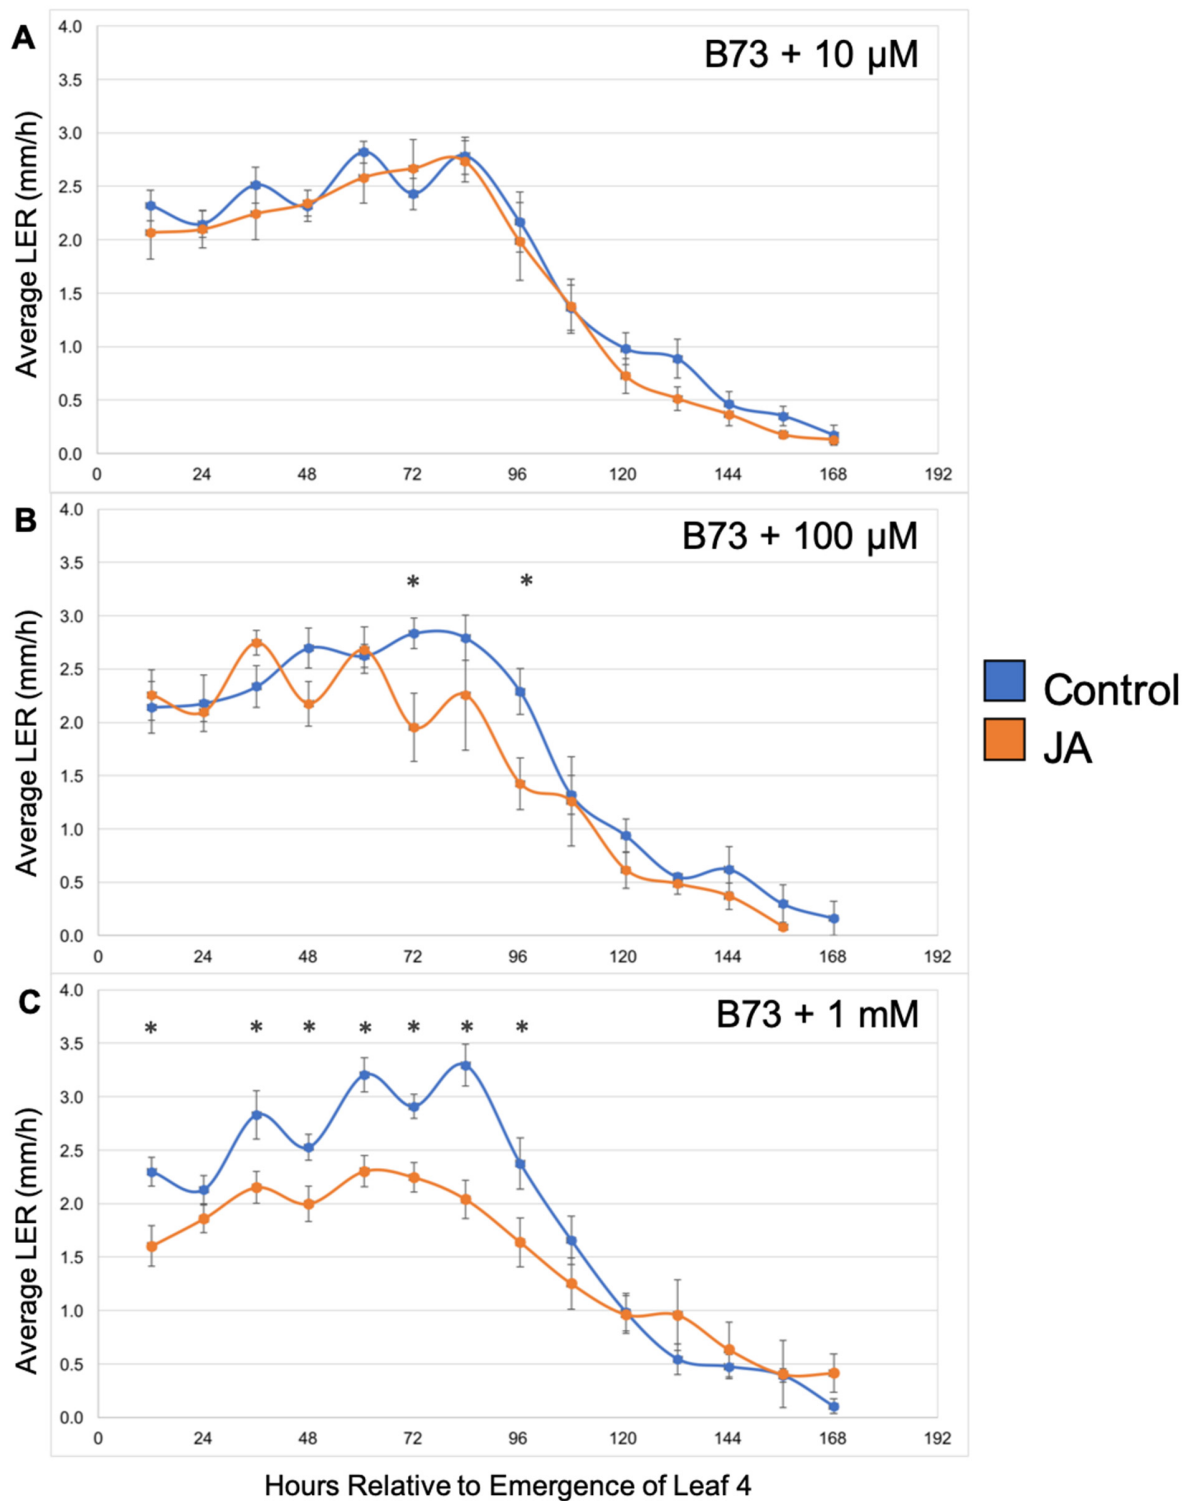

**Supplemental Figure S4.** LER dose response to JA in B73. Leaf 4 LERs of B73 treated with (A) 10  $\mu$ M, (B) 100  $\mu$ M, and (C) 1 mM JA for 6 days. Significant differences  $P < 0.05$  calculated by Student's t-test are marked by asterisks and error bars are SE.

**Supplemental Table S1.** Percent leaf size reduction after exogenous 1 mM JA treatment. Percent reductions  $[(JA-C)/C * 100]$  in sheath length, blade length, and blade width by leaf number. Red means significant value  $P < 0.05$ .

|               | Leaf 1  | Leaf 2  | Leaf 3  | Leaf 4  |
|---------------|---------|---------|---------|---------|
| Sheath Length | -23.30% | -30.90% | -21.90% | -17.80% |
| Blade Length  | -29.90% | -28.70% | -30.50% | -26.00% |
| Blade Width   | -18.70% | -9.30%  | -15.30% | -14.30% |

**Supplemental Table S2.** Percent leaf size reduction after 48 hours of exogenous 1 mM JA treatment. Percent reductions  $[(JA-C)/C * 100]$  in sheath length, blade length, and blade width by leaf number. Red means significant value  $P < 0.05$ .

|               | Leaf 1  | Leaf 2  | Leaf 3  | Leaf 4 |
|---------------|---------|---------|---------|--------|
| Sheath Length | -17.30% | -5.20%  | -4.00%  | -4.70% |
| Blade Length  | -27.10% | -20.50% | -11.70% | -0.30% |
| Blade Width   | -18.80% | -13.60% | -8.50%  | -6.70% |

**Supplemental Table S3.** Relevant comparisons of *Hsf1*/+ and WT-sibling final leaf size percent reductions after JA treatment. (i) WT-sibling compared to *Hsf1*/+ without JA, (ii) WT-sibling with JA treatment, (iii) *Hsf1*/+ with JA treatment, (iv) WT-sibling compared to *Hsf1*/+ both treated with JA. Red means significant percent difference  $P < 0.05$ .

| <b>i. WT Control vs. <i>Hsf1</i>/+ Control</b>         |               |               |               |               |
|--------------------------------------------------------|---------------|---------------|---------------|---------------|
|                                                        | <b>Leaf 1</b> | <b>Leaf 2</b> | <b>Leaf 3</b> | <b>Leaf 4</b> |
| Sheath Length                                          | -22.20%       | -18.40%       | -16.50%       | -14.50%       |
| Blade Length                                           | -20.20%       | -21.90%       | -22.80%       | -13.50%       |
| Blade Width                                            | -22.90%       | -20.60%       | -21.80%       | -15.20%       |
|                                                        |               |               |               |               |
| <b>ii. WT Control vs. WT JA</b>                        |               |               |               |               |
|                                                        | <b>Leaf 1</b> | <b>Leaf 2</b> | <b>Leaf 3</b> | <b>Leaf 4</b> |
| Sheath Length                                          | -28.80%       | -16.90%       | -15.90%       | -12.20%       |
| Blade Length                                           | -44.80%       | -39.00%       | -25.80%       | -18.90%       |
| Blade Width                                            | -27.80%       | -23.40%       | -20.40%       | -10.60%       |
|                                                        |               |               |               |               |
| <b>iii. <i>Hsf1</i>/+ Control vs. <i>Hsf1</i>/+ JA</b> |               |               |               |               |
|                                                        | <b>Leaf 1</b> | <b>Leaf 2</b> | <b>Leaf 3</b> | <b>Leaf 4</b> |
| Sheath Length                                          | -16.50%       | -15.80%       | -15.00%       | -7.80%        |
| Blade Length                                           | -38.10%       | -37.40%       | -25.30%       | -17.50%       |
| Blade Width                                            | -29.00%       | -9.20%        | -17.60%       | -13.40%       |
|                                                        |               |               |               |               |
| <b>iv. WT JA vs. <i>Hsf1</i>/+ JA</b>                  |               |               |               |               |
|                                                        | <b>Leaf 1</b> | <b>Leaf 2</b> | <b>Leaf 3</b> | <b>Leaf 4</b> |
| Sheath Length                                          | -8.80%        | -17.30%       | -15.60%       | -10.20%       |
| Blade Length                                           | -10.50%       | -19.80%       | -22.40%       | -12.00%       |
| Blade Width                                            | -24.20%       | -5.90%        | -19.10%       | -17.90%       |

**Supplemental Table S4.** Relevant comparisons of *opr7 opr8* double mutant final leaf size percent reductions. (i) *opr7 opr8* compared to JA sufficient *opr7/opr7 OPR8/opr8* (ii) *opr7 opr8* compared to JA sufficient *opr7/opr7 OPR8/OPR8*. Red means significant percent difference  $P < 0.05$ .

| <b>i. <i>opr7/opr7 opr8/opr8</i> vs. <i>opr7/opr7 OPR8/opr8</i></b>  |               |               |               |               |
|----------------------------------------------------------------------|---------------|---------------|---------------|---------------|
|                                                                      | <b>Leaf 1</b> | <b>Leaf 2</b> | <b>Leaf 3</b> | <b>Leaf 4</b> |
| Sheath Length                                                        | 39.5%         | 22.2%         | 11.0%         | -1.4%         |
| Blade Length                                                         | 43.0%         | 36.8%         | 22.6%         | 14.2%         |
| Blade Width                                                          | -7.6%         | -1.6%         | 10.0%         | 17.6%         |
|                                                                      |               |               |               |               |
| <b>ii. <i>opr7/opr7 opr8/opr8</i> vs. <i>opr7/opr7 OPR8/OPR8</i></b> |               |               |               |               |
|                                                                      | <b>Leaf 1</b> | <b>Leaf 2</b> | <b>Leaf 3</b> | <b>Leaf 4</b> |
| Sheath Length                                                        | 43.3%         | 21.0%         | 12.4%         | -2.3%         |
| Blade Length                                                         | 48.2%         | 38.2%         | 24.2%         | 12.9%         |
| Blade Width                                                          | -9.5%         | -4.8%         | 9.2%          | 18.6%         |

**Supplemental Table S5.** The list of primers used in this study.

| Primer Name | Target Gene (MaizeGDB loci)               | Sequence                             | Product (bp)                      | Purpose                      |
|-------------|-------------------------------------------|--------------------------------------|-----------------------------------|------------------------------|
| ARV0090*    | Mu-9242                                   | AGAGAAGCCAACGCCAWCGCCTCYATT<br>TCGTC | n/a                               | Genotype<br><i>opr7 opr8</i> |
| ARV0097     | <i>OPR7</i><br>( <i>Zm00001d032049</i> )  | CGACACACATGCTCAAAATCGAGA             | WT = 816<br><i>opr7</i> = 418/398 |                              |
| ARV0098     |                                           | CTCCACCAGACCATCAGATCTAGC             |                                   |                              |
| ARV0099     | <i>OPR8</i><br>( <i>Zm00001d050107</i> )  | TATGGCAAGTATCCAACTCCGAGG             | WT =942<br><i>opr8</i> =530/412   |                              |
| ARV0100     |                                           | ACACGAACAATAGTCCGCCTCTTA             |                                   |                              |
| ARV0143     | <i>Ts5</i><br>( <i>Zm00001d049201</i> )   | ACACGCAATGTTTTTGCTGC                 | WT = 129<br>Ts5/+ = 129/138       | Genotype<br><i>Ts5/+</i>     |
| ARV0144     |                                           | ggccgtatcttcgctggata                 |                                   |                              |
| ARV0129     | <i>ABPH1</i><br>( <i>Zm00001d002982</i> ) | AGGATTTCTGCTGAAGC                    | 174                               | qRT-PCR                      |
| ARV0130     |                                           | GACACAGAGCTTCGGAAT                   |                                   |                              |
| ARV0131     | <i>RR6</i><br>( <i>Zm00001d001865</i> )   | TCATGTCATCGGAGAACGTG                 | 245                               | qRT-PCR                      |
| ARV0132     |                                           | TCCCCCAAATGTTAGCTC                   |                                   |                              |
| ARV0113     | <i>CKO2</i><br>( <i>Zm00001d042148</i> )  | TTCAACCCTCCTTCCGTCTTCC               | 135                               | qRT-PCR                      |
| ARV0114     |                                           | TGGGGAGCTTGAATCAGAAGG                |                                   |                              |
| ARV0177     | <i>ts1</i><br>( <i>Zm00001d003533</i> )   | CCCCAACAGCGTTACCATTT                 | 191                               | qRT-PCR                      |
| ARV0178     |                                           | CTGTTCCGACCACCAAATCA                 |                                   |                              |
| ARV0183     | <i>AOS1a</i><br>( <i>Zm00001d034184</i> ) | ACTACCTTCTGCTCCTCCCCACCCG            | 133                               | qRT-PCR                      |
| ARV0184     |                                           | GCGGTATGCTAGAACGGACA                 |                                   |                              |
| ARV0189     | <i>AOS2a</i><br>( <i>Zm00001d028282</i> ) | GAAAACCCTGAAACCTTGGTGAAG             | 101                               | qRT-PCR                      |
| ARV0190     |                                           | GAGGGCGCTACTGAAACCAC                 |                                   |                              |
| ARV0135     | <i>AOC1</i><br>( <i>Zm00001d029594</i> )  | TCAATTCGTGAGTGCGTGGTAG               | 87                                | qRT-PCR                      |
| ARV0136     |                                           | ATCAGAAGCAGCCAAGTGAAGC               |                                   |                              |
| ARV0179     | <i>AOC2</i><br>( <i>Zm00001d047340</i> )  | TCACAAACAAGGTTTACAACGGCAGC           | 182                               | qRT-PCR                      |
| ARV0182     |                                           | CGACTCCTCGTAGGTCAGGTACGC             |                                   |                              |
| ARV0033     | <i>OPR7</i><br>( <i>Zm00001d032049</i> )  | CACATTCTCGGCCAGCCTA                  | 130                               | qRT-PCR                      |
| ARV0034     |                                           | TCGCGGCATTACCCAGATGT                 |                                   |                              |
| ARV0027     | <i>OPR8</i><br>( <i>Zm00001d050107</i> )  | AGTATCCAACTCCGAGGCGC                 | 80                                | qRT-PCR                      |
| ARV0028     |                                           | GGCGTTTATGGCAGCCTGTC                 |                                   |                              |
| ARV0037     | <i>JAR1b</i>                              | CCCGGTCGCTACGTCATCTT                 | 94                                | qRT-PCR                      |



|         |                                  |                        |     |                         |
|---------|----------------------------------|------------------------|-----|-------------------------|
| ARV0038 | (Zm00001d009714)                 | CGACGAAGGCTAGGTCCAGG   |     |                         |
| ARV0195 | <i>JAR2b</i><br>(Zm00001d039346) | TGATGGACAGCACGAGGTTC   | 73  | qRT-PCR                 |
| ARV0196 |                                  | AAGGTGGCCGGTCTCTACAA   |     |                         |
| ARV0011 | <i>Ts5</i><br>(Zm00001d049201)   | CCGCGCTGACATGGTTCTTC   | 131 | qRT-PCR                 |
| ARV0012 |                                  | GTGGAGCACGCTCATCTTGC   |     |                         |
| ARV0081 | <i>MYC7</i><br>(Zm00001d030028)  | AACCGATGTTAGCGTTGGGTTG | 138 | qRT-PCR                 |
| ARV0082 |                                  | AAGCCTGACTCCATTGCAAAGC |     |                         |
| ARV0235 | <i>MPI</i><br>(Zm00001d011080)   | ACGCCAAGAAGGTGATCCTC   | 106 | qRT-PCR                 |
| ARV2036 |                                  | AAGATGCGGACACGGTTAGG   |     |                         |
| ARV0045 | <i>TBP1</i><br>(Zm00001d033472)  | CCCTGGTGAACACGGACACT   | 243 | qRT-PCR<br>control gene |
| ARV0046 |                                  | CTTGCCCTTTGCCCTTGTC    |     |                         |

\*Serves as a forward and reverse.

Supplemental Table S6. Metabolite-specific parameters used in triple quad LC-MS for hormone quantification in B73 and *Hsf1*.

| Abbreviation  | Chemical/Common Name                 | RT (min) | MW     | Q1 (m/z) | Q3 (m/z) |
|---------------|--------------------------------------|----------|--------|----------|----------|
| 12COOH-JA-Ile | 12-carboxy-jasmonic acid             | 5.4      | 339.3  | 352      | 130      |
| 12OH-JA-Ile   | 12-hydroxy-jasmonic acid isoleucine  | 5.3      | 353    | 338.3    | 130      |
| 12-OPDA       | 12-oxo-10(Z),15(Z)-phytodienoic acid | 11.02    | 292.4  | 291.2    | 165.1    |
| GA3           | gibberelic acid-3                    | 3.98     | 346.4  | 345.2    | 239.1    |
| IAA           | auxin / indole-3-acetic acid         | 4.98     | 175.18 | 174      | 130      |
| JA            | jasmonic acid                        | 6.7      | 210.27 | 209.1    | 59       |
| JA-Ile        | jasmonic acid isoleucine             | 8.2      | 323.44 | 322.2    | 130      |
| SA            | salicylic acid                       | 4.26     | 138.12 | 137      | 92.9     |
